# Supplementary material
Source: PubMed Central journal article supplement (PMC6741498)
Supplement: jin-0005-0015-s01.pdf [file jin-0005-0015-s01.pdf]

Blazusiak et al  
Fig.R1.

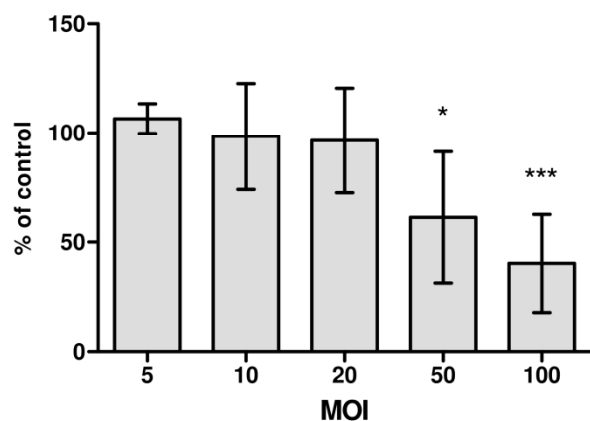

**Fig.R1. The influence of *E. coli* on hMDMs viability.** The macrophages were infected with different MOI ranging from 5 to 100 for 4 h, then MTT cytotoxicity assay was performed. The viability of *E. coli* infected hMDMs is presented as the percentage of non-infected control hMDMs, which were considered to be 100%. Data represent mean values  $\pm$ SD calculated from the results of three - six independent experiments using hMDMs derived from different donors. \*,  $p < 0.05$ ; \*\*\*,  $p < 0.001$ ;
